# Supplementary material for: Comparison of Preformed Orthodontic Archwires with Modified Dental Arch Forms: A Cross-Sectional Study
Source: Research Square preprint supplement (doi:10.21203/rs.3.rs-8309904/v1), 2025-12-30
Supplement: Supplementary file 1 [file 74be7023f6b81eea1ffb97ac.docx]

**STROBE Statement—Checklist for Cross‑Sectional Studies**

Manuscript: Comparison of Preformed Orthodontic Archwires with Modified Dental Arch Forms: A Cross‑Sectional Study

Corresponding author: Salah M. Bin Hafedh (salah.hafedh@gmc‑ye.com)

Journal target: BMC Oral Health (Research Article)

| Item | Recommendation (abridged) | Where reported in manuscript | Notes |
| --- | --- | --- | --- |
| 1a | Indicate study design in the title or abstract | Title; Abstract (first sentence) |  |
| 1b | Provide an informative and balanced abstract | Structured Abstract |  |
| 2 | Explain scientific background and rationale | Background |  |
| 3 | State specific objectives | Background (final paragraph) |  |
| 4 | Present key elements of study design early | Methods—Study design and setting |  |
| 5 | Describe setting, locations, and relevant dates | Methods—Study design and setting |  |
| 6a | Eligibility criteria and selection methods | Methods—Participants and eligibility |  |
| 6b | Give reasons for non‑participation | Figure 2 (flow); reasons not collected | Not applicable/Not collected |
| 7 | Clearly define outcomes, exposures, predictors | Methods—Outcomes; Landmarks and measurements; Arch form categorization |  |
| 8 | Data sources and assessment methods | Methods—Model digitization and quality control; Landmarks and measurements |  |
| 9 | Describe efforts to address potential sources of bias | Methods—Model digitization and QC; Reliability and repeatability; Sensitivity analyses |  |
| 10 | Explain how the study size was arrived at | Methods—Sampling frame and sample size |  |
| 11 | Explain handling of quantitative variables | Methods—Landmarks and measurements; Outcomes |  |
| 12a | Describe all statistical methods | Methods—Statistical analysis |  |
| 12b | Methods for subgroup/interaction analyses | Methods—Statistical analysis; Sensitivity analyses |  |
| 12c | How missing data were addressed | Methods—Statistical analysis | Complete‑case; no imputation |
| 12d | Analytical methods accounting for sampling strategy | Methods—Statistical analysis | Not applicable |
| 12e | Sensitivity analyses | Methods—Sensitivity analyses |  |
| 13a | Report numbers at each stage of study | Results—Sample characteristics; Figure 2 |  |
| 13b | Reasons for non‑participation at each stage | Figure 2 | Not collected |
| 13c | Consider a flow diagram | Figure 2 | Provided |
| 14a | Give characteristics of study participants | Results—Sample characteristics; Arch dimensions; Table 1 |  |
| 14b | Indicate number of participants with missing data | Results—Sample characteristics | No missing data reported |
| 15 | Report outcome data (numbers, summary measures) | Results—Archwire adaptability; Tables 2–4 |  |
| 16a | Unadjusted and, if applicable, adjusted estimates with precision | Results—Archwire adaptability; Table 3 | Unadjusted means and differences; 95% CIs described in methods framework |
| 16b | Report category boundaries when continuous variables were categorized | Methods—Arch form categorization | Canonical templates (tapered/ovoid/square) |
| 17 | Report other analyses (e.g., subgroups, interactions) | Discussion—Comparison with contemporary literature; Methods—Sensitivity analyses |  |
| 18 | Summarize key results with reference to objectives | Discussion (opening paragraph); Conclusions |  |
| 19 | Discuss limitations of the study | Discussion—Limitations and future research |  |
| 20 | Provide cautious overall interpretation of results | Discussion—Clinical implications; Concluding clinical recommendations |  |
| 21 | Discuss generalisability (external validity) | Discussion—Population context and external validity |  |
| 22 | Source of funding and role of funders | Declarations—Funding | None |

Checklist source and guidance:

• STROBE Statement (Cross‑sectional studies): https://www.strobe-statement.org/checklists/

• EQUATOR Network—STROBE: https://www.equator-network.org/reporting-guidelines/strobe/
