# Supplementary material for: Comparison of Preformed Orthodontic Archwires with Modified Dental Arch Forms: A Cross-Sectional Study
Source: Research Square preprint supplement (doi:10.21203/rs.3.rs-8309904/v1), 2025-12-30
Supplement: Supplementary file 2 [file d2a90a5e8134dac3953c8b34.docx]

# Tables – Comparison of Preformed Archwires with Modified Dental Arch Forms

Table 1. Sample characteristics.

| Characteristic | Value |
| --- | --- |
| Total sample (n) | 222 |
| Male | 115 |
| Female | 107 |
| Angle Class I | 120 (approx.) |
| Angle Class II | 102 (approx.) |

Table 2. Overall mean arch dimensions (CBP‑based).

| Arch / Landmark | Mean (SD) |
| --- | --- |
| Maxilla Wc (mm) | 35.92 (—) |
| Maxilla Wm (mm) | 54.54 (—) |
| Mandible Wc (mm) | 28.37 (—) |
| Mandible Wm (mm) | 48.85 (—) |

Table 3. Mean archwire–arch differences (mm).

| Landmark | Mean difference (mm) |
| --- | --- |
| Maxillary canines (L3) | +3.38 |
| Maxillary first molars (L6) | +1.94 |
| Mandibular canines (L3) | +4.05 |
| Mandibular first molars (L6) | +1.53 |

Table 4. Wires with closest geometric matches.

| Manufacturer | Model/form | Notes |
| --- | --- | --- |
| 3M | Ortho Form I (tapered) | Overall closest at L3/L6 |
| Dentaurum | Arch Form I (tapered) | Close at L3; modest at L6 |
| Ormco | Ortho Small | Close at L6; narrower canine |
